# Supplementary material for: Mutations of the Bacillus subtilis YidC1 (SpoIIIJ) insertase alleviate stress associated with σM-dependent membrane protein overproduction
Source: PubMed Central journal article supplement (PMC6827917; doi:10.1371/journal.pgen.1008263), 2019-10-18
Supplement: pgen.1008263.s008.pdf [file pgen.1008263.s008.pdf]

**Table S2. Whole genome sequencing of transformants generated by congression**

| Position      | Reference | Allele | Count | Coverage | Frequency | Gene         | DNA change        | Amino acid change |
|---------------|-----------|--------|-------|----------|-----------|--------------|-------------------|-------------------|
| <b>Supp-1</b> |           |        |       |          |           |              |                   |                   |
| 25203         | G         | A      | 72    | 75       | 96        |              |                   |                   |
| 96240         | G         | A      | 86    | 138      | 62.32     |              |                   |                   |
| 96260         | G         | A      | 65    | 122      | 53.28     |              |                   |                   |
| 486574        | T         | C      | 68    | 69       | 98.55     | <i>ydaO</i>  | 143T>C            | Ile48Thr          |
| 1297396       | G         | A      | 73    | 73       | 100       | <i>yjIA</i>  | 199C>T            | Pro67Ser          |
| 2277179       | A         | C      | 83    | 83       | 100       | <i>yokI</i>  | 243T>G            | Ile81Met          |
| 2277245       | GT        | AC     | 36    | 64       | 56.25     | <i>yokI</i>  | 176_177delACinsGT | Asp59Gly          |
| 3391676       | A         | G      | 41    | 41       | 100       | <i>gerAA</i> | 895A>G            | Thr299Ala         |
| 3696869       | T         | C      | 97    | 97       | 100       | <i>pgdS</i>  | 630A>G            |                   |
| 4214191       | G         | T      | 63    | 63       | 100       | <i>yidC1</i> | 418C>A            | Gln140Lys         |
| <b>Supp-2</b> |           |        |       |          |           |              |                   |                   |
| 25203         | G         | A      | 61    | 61       | 100       |              |                   |                   |
| 56151         | G         | A      | 67    | 67       | 100       | <i>spoVG</i> | 286G>A            | Ala96Thr          |
| 455105        | T         | C      | 14    | 25       | 56        | <i>yczH</i>  | 156A>G            |                   |
| 4214191       | G         | T      | 50    | 50       | 100       | <i>yidC1</i> | 418C>A            | Gln140Lys         |

| Position      | Reference    | Allele | Count | Coverage | Frequency | Gene         | DNA change | Amino acid change |
|---------------|--------------|--------|-------|----------|-----------|--------------|------------|-------------------|
| <b>Supp-3</b> |              |        |       |          |           |              |            |                   |
| 4205388       | G            | A      | 101   | 101      | 100       | <i>yyaC</i>  | 489G>A     |                   |
| 4214191       | G            | T      | 60    | 60       | 100       | <i>yidC1</i> | 418C>A     | Gln140Lys         |
| <b>Supp-4</b> |              |        |       |          |           |              |            |                   |
| 4214191       | G            | T      | 49    | 49       | 100       | <i>yidC1</i> | 418C>A     | Gln140Lys         |
| <b>Supp-5</b> |              |        |       |          |           |              |            |                   |
| 2600044       | TATTGTATAATG | -      | 42    | 43       | 97.67     |              |            |                   |
| 4205388       | G            | A      | 79    | 79       | 100       | <i>yyaC</i>  | 489G>A     |                   |
| 4214191       | G            | T      | 67    | 68       | 98.53     | <i>yidC1</i> | 418C>A     | Gln140Lys         |
| <b>Supp-6</b> |              |        |       |          |           |              |            |                   |
| 4205388       | G            | A      | 97    | 97       | 100       | <i>yyaC</i>  | 489G>A     |                   |
| 4214191       | G            | T      | 67    | 69       | 97.1      | <i>yidC1</i> | 418C>A     | Gln140Lys         |

| Position       | Reference | Allele | Count | Coverage | Frequency | Gene         | DNA change | Amino acid change |
|----------------|-----------|--------|-------|----------|-----------|--------------|------------|-------------------|
| <b>Supp-7</b>  |           |        |       |          |           |              |            |                   |
| 4205388        | G         | A      | 72    | 72       | 100       | <i>yyaC</i>  | 489G>A     |                   |
| 4214191        | G         | T      | 47    | 47       | 100       | <i>yidC1</i> | 418C>A     | Gln140Lys         |
| <b>Supp-9</b>  |           |        |       |          |           |              |            |                   |
| 4214191        | G         | T      | 11    | 11       | 100       | <i>yidC1</i> | 418C>A     | Gln140Lys         |
| <b>Supp-10</b> |           |        |       |          |           |              |            |                   |
| 4214191        | G         | T      | 51    | 51       | 100       | <i>yidC1</i> | 418C>A     | Gln140Lys         |
| <b>Supp-11</b> |           |        |       |          |           |              |            |                   |
| 2002473        | T         | G      | 85    | 87       | 97.7      |              |            |                   |
| 4214191        | G         | T      | 71    | 71       | 100       | <i>yidC1</i> | 418C>A     | Gln140Lys         |
| <b>Supp-12</b> |           |        |       |          |           |              |            |                   |
| 2707867        | A         | C      | 59    | 86       | 68.6      |              |            |                   |

| Position       | Reference | Allele | Count | Coverage | Frequency | Gene         | DNA change        | Amino acid change |
|----------------|-----------|--------|-------|----------|-----------|--------------|-------------------|-------------------|
| <b>Supp-13</b> |           |        |       |          |           |              |                   |                   |
| 3810012        | G         | A      | 128   | 129      | 99.22     |              |                   |                   |
| 4214191        | G         | T      | 47    | 47       | 100       | <i>yidC1</i> | 418C>A            | Gln140Lys         |
| <b>Supp-14</b> |           |        |       |          |           |              |                   |                   |
| 96240          | G         | A      | 16    | 17       | 94.12     |              |                   |                   |
| 96260          | G         | A      | 13    | 14       | 92.86     |              |                   |                   |
| 775706         | -         | T      | 18    | 32       | 56.25     | <i>yesZ</i>  | 907_908insT       | Ala303fs          |
| 775707         | C         | T      | 18    | 32       | 56.25     | <i>yesZ</i>  | 909C>T            |                   |
| 775710         | -         | T      | 17    | 33       | 51.52     | <i>yesZ</i>  | 911_912insT       | Leu305fs          |
| 775721         | CC        | AA     | 12    | 28       | 42.86     | <i>yesZ</i>  | 923_924delCCinsAA | Ser308*           |
| 1013666        | G         | T      | 15    | 28       | 53.57     | <i>nsrR</i>  | 186C>A            |                   |
| 1855412        | A         | T      | 17    | 34       | 50        | <i>pksR</i>  | 4523A>T           | Asn1508Ile        |
| 1855416        | A         | T      | 18    | 36       | 50        | <i>pksR</i>  | 4527A>T           | Gln1509His        |
| 1855428        | T         | G      | 21    | 40       | 52.5      | <i>pksR</i>  | 4539T>G           | Ile1513Met        |
| 2129223        | G         | C      | 37    | 37       | 100       | <i>yodE</i>  | 771C>G            |                   |
| 2846430        | T         | A      | 11    | 21       | 52.38     | <i>nadA</i>  | 632A>T            | Glu211Val         |

| Position                      | Reference | Allele | Count | Coverage | Frequency | Gene         | DNA change        | Amino acid change |
|-------------------------------|-----------|--------|-------|----------|-----------|--------------|-------------------|-------------------|
| <b>Supp-14</b><br>(continued) |           |        |       |          |           |              |                   |                   |
| 3510969                       | AA        | GC     | 14    | 41       | 34.15     | <i>yvfH</i>  | 190_191delAAinsGC | Lys64Ala          |
| 3510977                       | G         | A      | 21    | 40       | 52.5      | <i>yvfH</i>  | 198G>A            |                   |
| 3510979                       | T         | A      | 20    | 40       | 50        | <i>yvfH</i>  | 200T>A            | Met67Lys          |
| 4214191                       | G         | T      | 31    | 31       | 100       | <i>yidC1</i> | 418C>A            | Gln140Lys         |
| <b>Supp-15</b>                |           |        |       |          |           |              |                   |                   |
| 1976137                       | C         | T      | 134   | 134      | 100       | <i>ppsC</i>  | 6412G>A           | Asp2138Asn        |
| 4214191                       | G         | T      | 49    | 49       | 100       | <i>yidC1</i> | 418C>A            | Gln140Lys         |
| <b>Supp-16</b>                |           |        |       |          |           |              |                   |                   |
| 4205388                       | G         | A      | 93    | 94       | 98.94     | <i>yyaC</i>  | 489G>A            |                   |
| 4214191                       | G         | T      | 59    | 59       | 100       | <i>yidC1</i> | 418C>A            | Gln140Lys         |

\*Suppressor 8 is not listed here as it contains over 900 SNPs compared with strain 168, and is possibly a contamination of PY79 endospore that survived genomic DNA extraction.

\*\*Suppressor 12 has only a single SNP, and the basis of suppression in this strain is unknown.
