# Supplementary material for: Mutations of the Bacillus subtilis YidC1 (SpoIIIJ) insertase alleviate stress associated with σM-dependent membrane protein overproduction
Source: PubMed Central journal article supplement (PMC6827917; doi:10.1371/journal.pgen.1008263), 2019-10-18
Supplement: pgen.1008263.s009.pdf [file pgen.1008263.s009.pdf]

**Table S3. Amino acid substitutions in YidC1 variants selected in *yhdL* depletion strain**

| Suppressor | Total Charge | Ile72Arg | Gln73Arg | Ile76Arg | Gln140Lys | Leu144Arg | Trp228Arg | Gly231Arg |
|------------|--------------|----------|----------|----------|-----------|-----------|-----------|-----------|
| 1          | 3            |          |          |          | 1         | 1         |           | 1         |
| 2          | 2            |          |          |          |           |           | 1         | 1         |
| 3          | 2            |          |          |          | 1         | 1         |           |           |
| 4          | 2            |          |          |          |           | 1         |           | 1         |
| 5          | 2            |          |          |          |           |           | 1         | 1         |
| 6          | 3            | 1        |          |          | 1         | 1         |           |           |
| 7          | 3            | 1        |          |          | 1         | 1         |           |           |
| 8          | 2            | 1        |          |          | 1         |           |           |           |
| 9          | 2            |          | 1        |          |           |           | 1         |           |
| 10         | 2            | 1        |          |          | 1         |           |           |           |
| 11         | 2            |          | 1        |          | 1         |           |           |           |
| 12         | 2            |          |          |          | 1         |           | 1         |           |
| 13         | 2            | 1        |          |          | 1         |           |           |           |
| 14         | 2            |          |          | 1        |           | 1         |           |           |
| 15         | 2            |          |          | 1        |           |           | 1         |           |
| 16         | 2            |          |          |          | 1         |           | 1         |           |
| 17         | 2            |          |          |          | 1         |           | 1         |           |
| 18         | 2            |          |          |          |           |           | 1         | 1         |
| 19         | 3            |          |          |          | 1         | 1         |           | 1         |
| 20         | 2            |          | 1        |          |           |           | 1         |           |
| 21         | 3            |          |          | 1        | 1         |           | 1         |           |
| 22         | 2            |          |          |          |           |           | 1         | 1         |
| 23         | 2            |          | 1        |          |           |           | 1         |           |
| 24         | 2            |          |          | 1        |           |           | 1         |           |
| 25         | 2            |          |          |          |           |           | 1         | 1         |
| 26         | 2            |          |          |          | 1         |           | 1         |           |
| 27         | 2            | 1        |          |          | 1         |           |           |           |
| 28         | 3            |          |          | 1        | 1         |           | 1         |           |
| 29         | 2            |          | 1        |          | 1         |           |           |           |
| 30         | 2            |          | 1        |          |           |           | 1         |           |
| 31         | 2            | 1        |          |          | 1         |           |           |           |
| 32         | 2            |          |          |          | 1         |           |           | 1         |
| 33         | 3            | 1        |          |          | 1         | 1         |           |           |
| 34         | 2            |          |          |          |           |           | 1         | 1         |
| 35         | 2            |          |          | 1        |           |           | 1         |           |
| 36         | 2            |          |          | 1        |           | 1         |           |           |
| 37         | 3            |          |          |          | 1         | 1         |           | 1         |
| 38         | 2            |          |          |          | 1         | 1         |           |           |
| 39         | 2            |          |          | 1        |           | 1         |           |           |
| 40         | 2            |          | 1        |          |           | 1         |           |           |
| 41         | 2            |          |          |          | 1         |           |           | 1         |

| Suppressor | Total Charge | Ile72Arg | Gln73Arg | Ile76Arg | Gln140Lys | Leu144Arg | Trp228Arg | Gly231Arg |
|------------|--------------|----------|----------|----------|-----------|-----------|-----------|-----------|
| 42         | 2            |          | 1        |          |           |           |           | 1         |
| 43         | 2            |          |          | 1        |           | 1         |           |           |
| 44         | 2            |          |          |          | 1         | 1         |           |           |
| 45         | 2            |          |          | 1        |           | 1         |           |           |
| 46         | 2            | 1        |          |          |           | 1         |           |           |
| 47         | 2            | 1        |          |          | 1         |           |           |           |
| 48         | 2            |          |          |          |           |           | 1         | 1         |
| 49         | 2            |          | 1        |          | 1         |           |           |           |
| 50         | 2            |          | 1        |          |           |           | 1         |           |
| 51         | 2            |          |          |          | 1         |           | 1         |           |
| 52         | 2            | 1        |          |          | 1         |           |           |           |
| 53         | 2            |          |          |          | 1         |           | 1         |           |
| 54         | 2            |          |          |          | 1         |           | 1         |           |
| 55         | 2            |          |          |          | 1         |           | 1         |           |
| 56         | 2            |          |          |          |           |           | 1         | 1         |
| 57         | 2            |          |          |          | 1         |           | 1         |           |
| 58         | 2            |          |          |          | 1         |           |           | 1         |
| 59         | 3            |          |          | 1        | 1         |           | 1         |           |
| 60         | 2            | 1        |          |          |           | 1         |           |           |
| 61         | 2            |          |          |          | 1         |           | 1         |           |
| 62         | 2            |          |          |          |           |           | 1         | 1         |
| 63         | 2            |          |          |          | 1         | 1         |           |           |
| 64         | 2            |          |          | 1        |           | 1         |           |           |
| 65         | 2            |          | 1        |          |           | 1         |           |           |
| 66         | 3            |          |          | 1        | 1         |           | 1         |           |
| 67         | 2            |          |          |          | 1         | 1         |           |           |
| 68         | 2            |          | 1        |          | 1         |           |           |           |
| 69         | 2            |          |          |          |           |           | 1         | 1         |
| 70         | 2            |          |          |          | 1         | 1         |           |           |
| 71         | 2            |          |          |          | 1         | 1         |           |           |
| 72         | 2            |          |          |          |           |           | 1         | 1         |
| 73         | 2            |          |          |          | 1         |           | 1         |           |
| 74         | 2            |          | 1        |          |           | 1         |           |           |
| 75         | 2            |          |          |          | 1         |           | 1         |           |
| 76         | 2            |          |          |          | 1         | 1         |           |           |
| 77         | 2            |          |          |          | 1         |           | 1         |           |
| 78         | 2            |          |          |          | 1         | 1         |           |           |
| 79         | 2            |          |          |          | 1         |           | 1         |           |
| 80         | 2            |          |          |          | 1         | 1         |           |           |
| 81         | 2            |          |          | 1        |           |           | 1         |           |
| 82         | 2            | 1        |          |          | 1         |           |           |           |
| 83         | 2            |          |          |          | 1         | 1         |           |           |
| 84         | 2            | 1        |          |          | 1         |           |           |           |

| Suppressor | Total Charge | Ile72Arg | Gln73Arg | Ile76Arg | Gln140Lys | Leu144Arg | Trp228Arg | Gly231Arg |
|------------|--------------|----------|----------|----------|-----------|-----------|-----------|-----------|
| 85         | 2            |          | 1        |          |           |           | 1         |           |
| 86         | 2            |          |          |          | 1         | 1         |           |           |
| 87         | 2            |          | 1        |          |           |           | 1         |           |
| 88         | 2            |          |          |          | 1         | 1         |           |           |
| 89         | 2            |          |          |          | 1         | 1         |           |           |
| 90         | 2            |          |          |          | 1         |           | 1         |           |
| 91         | 2            |          |          |          | 1         | 1         |           |           |
| 92         | 2            | 1        |          |          | 1         |           |           |           |
| 93         | 2            |          | 1        |          | 1         |           |           |           |
| 94         | 2            |          |          | 1        |           | 1         |           |           |
| 95         | 3            |          | 1        |          | 1         | 1         |           |           |
| 96         | 3            |          |          | 1        | 1         |           | 1         |           |
| 97         | 2            |          |          |          | 1         | 1         |           |           |
| 98         | 3            |          | 1        |          | 1         | 1         |           |           |
| 99         | 2            |          |          |          | 1         | 1         |           |           |
| 100        | 2            |          | 1        |          | 1         |           |           |           |
| 101        | 2            |          |          | 1        |           | 1         |           |           |
| 102        | 2            | 1        |          |          |           | 1         |           |           |
| 103        | 3            |          | 1        |          | 1         | 1         |           |           |
