# Supplementary material for: Mutations of the Bacillus subtilis YidC1 (SpoIIIJ) insertase alleviate stress associated with σM-dependent membrane protein overproduction
Source: PubMed Central journal article supplement (PMC6827917; doi:10.1371/journal.pgen.1008263), 2019-10-18
Supplement: pgen.1008263.s010.pdf [file pgen.1008263.s010.pdf]

**Table S4. Secreted and membrane-associated proteins in the  $\sigma^M$  regulon**

| <b>Locus</b> | <b>Gene</b>  | <b>Protein Localization</b>        | <b>Number of predicted transmembrane segments</b> |
|--------------|--------------|------------------------------------|---------------------------------------------------|
| BSU00570     | <i>yabM</i>  | cytoplasmic membrane               | 14                                                |
| BSU00600     | <i>yabP</i>  | forespore outer membrane           | Unknown                                           |
| BSU00610     | <i>yabQ</i>  | forespore outer membrane           | 6                                                 |
| BSU00620     | <i>divIC</i> | peripheral membrane protein        | Peripheral                                        |
| BSU00690     | <i>ftsH</i>  | cytoplasmic membrane               | 2                                                 |
| BSU02900     | <i>yceD</i>  | peripheral membrane protein        | Peripheral                                        |
| BSU02920     | <i>yceF</i>  | cytoplasmic membrane               | 6                                                 |
| BSU03240     | <i>ycgQ</i>  | cytoplasmic membrane               | 4                                                 |
| BSU03250     | <i>ycgR</i>  | cytoplasmic membrane               | 8                                                 |
| BSU04230     | <i>amj</i>   | cytoplasmic membrane               | 7                                                 |
| BSU06380     | <i>yebC</i>  | cytoplasmic membrane               | 5                                                 |
| BSU09500     | <i>yhdK</i>  | cytoplasmic membrane               | 3                                                 |
| BSU09510     | <i>yhdL</i>  | cytoplasmic membrane               | 1                                                 |
| BSU15220     | <i>murG</i>  | peripheral membrane protein        | Peripheral                                        |
| BSU15240     | <i>divIB</i> | cytoplasmic membrane               | 1                                                 |
| BSU15250     | <i>ylxW</i>  | Integral membrane protein          | Unknown                                           |
| BSU15260     | <i>ylxX</i>  | cytoplasmic membrane               | 1                                                 |
| BSU15270     | <i>sbp</i>   | cytoplasmic membrane               | 3                                                 |
| BSU15280     | <i>ftsA</i>  | cytoplasmic membrane and cytoplasm | Peripheral                                        |
| BSU15290     | <i>ftsZ</i>  | cytoplasmic membrane and cytoplasm | Peripheral                                        |
| BSU18190     | <i>yngC</i>  | cytoplasmic membrane               | 4                                                 |
| BSU21920     | <i>ugtP</i>  | peripheral membrane protein        | Peripheral                                        |
| BSU22320     | <i>ponA</i>  | cytoplasmic membrane               | 1                                                 |
| BSU27160     | <i>yrhJ</i>  | cytoplasmic membrane               | Unknown                                           |
| BSU27650     | <i>secDF</i> | cytoplasmic membrane               | 12                                                |
| BSU27990     | <i>minD</i>  | peripheral membrane protein        | Peripheral                                        |
| BSU28000     | <i>minC</i>  | peripheral membrane protein        | Peripheral                                        |
| BSU28010     | <i>mreD</i>  | cytoplasmic membrane               | 5                                                 |
| BSU28020     | <i>mreC</i>  | cytoplasmic membrane               | 1                                                 |
| BSU28030     | <i>mreB</i>  | peripheral membrane protein        | Peripheral                                        |
| BSU35650     | <i>tagU</i>  | cytoplasmic membrane               | 1                                                 |
| BSU35840     | <i>tagT</i>  | cytoplasmic membrane               | 1                                                 |
| BSU36530     | <i>bcrC</i>  | cytoplasmic membrane               | 4                                                 |
| BSU38120     | <i>rodA</i>  | cytoplasmic membrane               | 11                                                |
| BSU38260     | <i>efeB</i>  | Secreted protein                   | Secreted                                          |
| BSU38270     | <i>efeO</i>  | cytoplasmic membrane               | Peripheral                                        |
| BSU38280     | <i>efeU</i>  | cytoplasmic membrane               | 6                                                 |
| BSU38510     | <i>dltB</i>  | cytoplasmic membrane               | 10                                                |
