# Supplementary material for: Mutations of the Bacillus subtilis YidC1 (SpoIIIJ) insertase alleviate stress associated with σM-dependent membrane protein overproduction
Source: PubMed Central journal article supplement (PMC6827917; doi:10.1371/journal.pgen.1008263), 2019-10-18
Supplement: pgen.1008263.s011.pdf [file pgen.1008263.s011.pdf]

**Table S5. *Bacillus subtilis* strains used in this study**

| Number  | Genotype                                                                              | Note or Reference                                                                                                                                          |
|---------|---------------------------------------------------------------------------------------|------------------------------------------------------------------------------------------------------------------------------------------------------------|
| HB16780 | $\Delta P_M\text{-}murG$                                                              | Mutated <i>sigM</i> promoter inside <i>murG</i> gene using vector pMutin4                                                                                  |
| HB16812 | $\Delta P_M\text{-}murG \Delta P_M\text{-}maf$                                        |                                                                                                                                                            |
| HB17934 | $\Delta P_M\text{-}maf$                                                               | Mutated <i>sigM</i> promoter inside <i>maf</i> gene using vector pMutin4                                                                                   |
| HB18905 | <i>spx</i> :: $P_{spx}(P_{M1}^*)\text{-}spx$ ( <i>kan</i> )                           | From (1)                                                                                                                                                   |
| HB20830 | <i>yhdK</i> :: <i>erm</i>                                                             | All <i>gene</i> :: <i>erm</i> and <i>gene</i> :: <i>kan</i> strains were constructed as using genomic DNA of BKE or BKK strains into recipient strains (2) |
| HB20922 | <i>spx</i> :: $P_{spx}(P_{M1}^*)\text{-}spx$ ( <i>kan</i> ) <i>yhdK</i> :: <i>erm</i> |                                                                                                                                                            |
| HB21099 | $\Delta P_M\text{-}rodA$                                                              | $P_M$ promoter of <i>rodA</i> removed using CRISPR                                                                                                         |
| HB21117 | $\Delta P_M\text{-}rodA \Delta P_M\text{-}murG$                                       | $\Delta P_M\text{-}murG$ transformed with CRISPR plasmid to remove $P_M$ of <i>rodA</i>                                                                    |
| HB21118 | $\Delta P_M\text{-}rodA \Delta P_M\text{-}maf$                                        | $\Delta P_M\text{-}maf$ transformed with CRISPR plasmid to remove $P_M$ of <i>rodA</i>                                                                     |
| HB21266 | $\Delta P_M\text{-}maf \Delta P_M\text{-}murG \Delta P_M\text{-}rodA$                 | $P_M$ promoter of <i>rodA</i> removed using CRISPR from $\Delta P_M\text{-}maf \Delta P_M\text{-}murG$ background                                          |
| HB25433 | $\Delta P_M\text{-}maf yhdK::erm$                                                     |                                                                                                                                                            |
| HB25434 | $\Delta P_M\text{-}murG yhdK::erm$                                                    |                                                                                                                                                            |
| HB25435 | $\Delta P_M\text{-}rodA yhdK::erm$                                                    |                                                                                                                                                            |
| HB25436 | $\Delta P_M\text{-}murG \Delta P_M\text{-}maf yhdK::erm$                              |                                                                                                                                                            |
| HB25437 | $\Delta P_M\text{-}rodA \Delta P_M\text{-}maf yhdK::erm$                              |                                                                                                                                                            |
| HB25438 | $\Delta P_M\text{-}rodA \Delta P_M\text{-}murG yhdK::erm$                             |                                                                                                                                                            |
| HB25439 | $\Delta P_M\text{-}maf \Delta P_M\text{-}murG \Delta P_M\text{-}rodA yhdK::erm$       |                                                                                                                                                            |
| HB21248 | PY79 $P_M\text{-}lacZ yhdL::kan$                                                      | PY79 background, <i>yhdL</i> is not essential in PY79 background                                                                                           |
| HB21258 | 168 $P_M\text{-}lacZ yhdL::kan congression from PY79-1$                               |                                                                                                                                                            |
| HB21259 | 168 $P_M\text{-}lacZ yhdL::kan congression from PY79-2$                               |                                                                                                                                                            |
| HB21260 | 168 $P_M\text{-}lacZ yhdL::kan congression from PY79-3$                               |                                                                                                                                                            |
| HB21261 | 168 $P_M\text{-}lacZ yhdL::kan congression from PY79-4$                               |                                                                                                                                                            |
| HB21262 | 168 $P_M\text{-}lacZ yhdL::kan congression from PY79-5$                               |                                                                                                                                                            |
| HB21263 | 168 $P_M\text{-}lacZ yhdL::kan congression from PY79-6$                               |                                                                                                                                                            |
| HB21264 | 168 $P_M\text{-}lacZ yhdL::kan congression from PY79-7$                               |                                                                                                                                                            |
| HB21265 | 168 $P_M\text{-}lacZ yhdL::kan congression from PY79-8$                               | Not included in Figure S1, as this strain contains too many SNPs from PY79, possible endospore contamination from PY79 genomic DNA prep                    |
| HB21250 | 168 $P_M\text{-}lacZ yhdL::kan congression from PY79-9$                               |                                                                                                                                                            |
| HB21251 | 168 $P_M\text{-}lacZ yhdL::kan congression from PY79-10$                              |                                                                                                                                                            |

HB21252 168 P<sub>M</sub>-lacZ yhdL::kan congression from PY79-11  
 HB21253 168 P<sub>M</sub>-lacZ yhdL::kan congression from PY79-12  
 HB21254 168 P<sub>M</sub>-lacZ yhdL::kan congression from PY79-13  
 HB21255 168 P<sub>M</sub>-lacZ yhdL::kan congression from PY79-14  
 HB21256 168 P<sub>M</sub>-lacZ yhdL::kan congression from PY79-15  
 HB21257 168 P<sub>M</sub>-lacZ yhdL::kan congression from PY79-16  
 HB22728 yidC1  
 HB22789 P<sub>M</sub>-lacZ yidC1<sup>Q140K</sup> yhdL::kan  
 HB22848 yidC1<sup>Q140K</sup> yhdK::erm  
 HB22849 PY79 P<sub>M</sub>-lacZ yidC1<sup>K140Q</sup> yhdK::erm  
 HB22850 PY79 P<sub>M</sub>-lacZ yidC1 yhdK::erm  
 HB22883 PY79 yhdK::erm  
 HB22925 PY79 P<sub>M</sub>-lacZ yidC1<sup>K140Q</sup>  
 HB22926 PY79 P<sub>M</sub>-lacZ yidC1  
 HB22966 yidC1<sup>Q140K</sup>  
 HB23553 amyE::P<sub>spac(hy)</sub>-yidC1  
 HB23556 amyE::P<sub>spac(hy)</sub>-yidC2  
 HB23558 amyE::P<sub>spac(hy)</sub>-E. coli-yidC  
 HB23595 amyE::P<sub>spac(hy)</sub>-E. coli-yidC<sup>Q429K</sup>  
 HB25405 amyE::P<sub>spac(hy)</sub>-yidC1 yhdK::erm  
 HB25406 amyE::P<sub>spac(hy)</sub>-yidC2 yhdK::erm  
 HB25407 amyE::P<sub>spac(hy)</sub>-E.coli-yidC yhdK::erm  
 HB25408 amyE::P<sub>spac(hy)</sub>-E.coli-yidC<sup>Q429K</sup> yhdK::erm  
  
 HB23605 thrC::P<sub>M</sub>-spoVG-lacZ-spec ganA::P<sub>xyIA</sub>-yhdL amyE::yidC1 yhdL::kan  
 HB23606 thrC::P<sub>M</sub>-spoVG-lacZ-spec ganA::P<sub>xyIA</sub>-yhdL amyE::yidC1-jag yhdL::kan  
 HB23607 thrC::P<sub>M</sub>-spoVG-lacZ-spec ganA::P<sub>xyIA</sub>-yhdL amyE::yidC2 yhdL::kan  
 HB23608 thrC::P<sub>M</sub>-spoVG-lacZ-spec ganA::P<sub>xyIA</sub>-yhdL amyE::E. coli-yidC yhdL::kan  
 HB23609 thrC::P<sub>M</sub>-spoVG-lacZ-spec ganA::P<sub>xyIA</sub>-yhdL amyE::E. coli-yidC<sup>Q429K</sup> yhdL::kan  
 HB23610 yidC1<sup>R73A</sup> ganA::P<sub>xyIA</sub>-yidC2 yidC2::kan  
 HB23611 yidC1<sup>R73AQ140K</sup> ganA::P<sub>xyIA</sub>-yidC2 yidC2::kan  
 HB23698 yidC1<sup>R73AQ140K</sup> ganA::P<sub>xyIA</sub>-yhdL-cat yhdL::kan

yidC1 was mutated at its native locus using CRISPR  
 amyE::P<sub>spac(hy)</sub> constructs were made using plasmid pPL82

ganA::P<sub>xyIA</sub>-yhdL was constructed using pAX01, thrC::P<sub>M</sub>-spoVG-lacZ reporter was constructed using pDG1663, with the Erm<sup>R</sup> cassette replaced by a Spec<sup>R</sup> cassette using LFH PCR

ganA::P<sub>xyIA</sub>-yidC2 was constructed using pAX01

ganA::P<sub>xyIA</sub>-yhdL-cat was constructed using pAX01, and the original Erm<sup>R</sup> cassette in pAX01 was replaced by a CM<sup>R</sup> cassette using LFH PCR

HB23719 *yidC1*<sup>Q140K</sup> *ganA*::P<sub>xyIA</sub>-*yhdL*-cat *yhdL*::*Kan*  
 HB23902 *amyE*::P<sub>spac(hy)</sub>-*yidC2*<sup>Q148K</sup>  
 HB25409 *amyE*::P<sub>spac(hy)</sub>- *yidC2*<sup>Q148K</sup> *yhdK*::*erm*  
 HB23917 *yidC2*'-lacZ  
 HB23918 *yidC2*'-lacZ *yidC1*  
 HB23935 *yidC2*'-lacZ *yidC1 thrC*::*yidC1*-spec  
 HB23953 *ganA*::P<sub>xyIA</sub>-*yhdL* P<sub>M</sub>-lacZ *yhdL*::*kan*  
 HB23955 *yidC2 ganA*::P<sub>xyIA</sub>-*yidC2 yidC1*::*kan*  
 HB23965 *thrC*::*yidC1*-spec  
 HB23966 P<sub>M</sub>-lacZ *thrC*::*yidC1*-spec  
 HB23967 *yidC1 P<sub>M</sub>-lacZ thrC*::*yidC1*-spec  
 HB23968 *yidC2 P<sub>xyIA</sub>-yidC2 yidC1*::*kan thrC*::*yidC1*-spec  
 HB23969 *thrC*::*yidC1*<sup>Q140K</sup>-spec ΔP<sub>M</sub>-*maf*  
 HB23970 *thrC*::*yidC1*<sup>Q140K</sup>-spec ΔP<sub>M</sub>-*murG*  
 HB23971 *thrC*::*yidC1*<sup>Q140K</sup>-spec ΔP<sub>M</sub>-*rodA*  
 HB23972 *thrC*::*yidC1*<sup>Q140K</sup>-spec ΔP<sub>M</sub>-*maf* ΔP<sub>M</sub>-*murG*  
 HB23973 *thrC*::*yidC1*<sup>Q140K</sup>-spec ΔP<sub>M</sub>-*maf* ΔP<sub>M</sub>-*rodA*  
 HB23974 *thrC*::*yidC1*<sup>Q140K</sup>-spec ΔP<sub>M</sub>-*murG* ΔP<sub>M</sub>-*rodA*  
 HB23975 *thrC*::*yidC1*<sup>Q140K</sup>-spec ΔP<sub>M</sub>-*maf* ΔP<sub>M</sub>-*murG* ΔP<sub>M</sub>-*rodA*  
 HB25440 *thrC*::*yidC1*<sup>Q140K</sup>-spec ΔP<sub>M</sub>-*maf yhdK*::*erm*  
 HB25441 *thrC*::*yidC1*<sup>Q140K</sup>-spec ΔP<sub>M</sub>-*murG yhdK*::*erm*  
 HB25442 *thrC*::*yidC1*<sup>Q140K</sup>-spec ΔP<sub>M</sub>-*rodA yhdK*::*erm*  
 HB25443 *thrC*::*yidC1*<sup>Q140K</sup>-spec ΔP<sub>M</sub>-*maf* ΔP<sub>M</sub>-*murG yhdK*::*erm*  
 HB25444 *thrC*::*yidC1*<sup>Q140K</sup>-spec ΔP<sub>M</sub>-*maf* ΔP<sub>M</sub>-*rodA yhdK*::*erm*  
 HB25445 *thrC*::*yidC1*<sup>Q140K</sup>-spec ΔP<sub>M</sub>-*murG* ΔP<sub>M</sub>-*rodA yhdK*::*erm*  
 HB25446 *t thrC*::*yidC1*<sup>Q140K</sup>-spec ΔP<sub>M</sub>-*maf* ΔP<sub>M</sub>-*murG* ΔP<sub>M</sub>-*rodA yhdK*::*erm*  
 HB23976 *thrC*::*yidC1*-spec WT (R73)  
 HB23977 P<sub>M</sub>-lacZ *thrC*::*yidC1*-spec WT (R73)  
 HB23978 *yidC1 P<sub>M</sub>-lacZ thrC*::*yidC1*-spec WT (R73)  
 HB25354 *yidC1 P<sub>M</sub>-lacZ thrC*::*yidC1*-spec sup (R144R231)  
 HB25355 *yidC1 P<sub>M</sub>-lacZ thrC*::*yidC1*-spec sup (R72K140)  
 HB25356 *yidC1 P<sub>M</sub>-lacZ thrC*::*yidC1*-spec sup (R73R228)

Genomic DNA of SCB751 (3) transformed into 168

Genomic DNA of SCB751 (3) transformed into HB22728

*thrC*::*yidC1*-spec WT allele was constructed using LFH PCR

*thrC*::*yidC1*-spec allele variants were constructed using degenerative primers and LFH PCR

HB25357 *yidC1 P<sub>M-lacZ</sub> thrC::yidC1-spec sup* (K140R231)  
HB25358 *yidC1 P<sub>M-lacZ</sub> thrC::yidC1-spec sup* (R76R144)  
HB25359 *yidC1 P<sub>M-lacZ</sub> thrC::yidC1-spec sup* (R73R144)  
HB25360 *yidC1 P<sub>M-lacZ</sub> thrC::yidC1-spec sup* (R73R231)  
HB25361 *yidC1 P<sub>M-lacZ</sub> thrC::yidC1-spec sup* (K140R228)  
HB25362 *yidC1 P<sub>M-lacZ</sub> thrC::yidC1-spec sup* (R228R231)  
HB25363 *yidC1 P<sub>M-lacZ</sub> thrC::yidC1-spec sup* (R72R144)  
HB25364 *yidC1 P<sub>M-lacZ</sub> thrC::yidC1-spec sup* (K140R144R231)  
HB25366 *yidC1 P<sub>M-lacZ</sub> thrC::yidC1-spec sup* (R73K140R144)  
HB25376 *yhdK::erm yidC1 P<sub>M-lacZ</sub> thrC::yidC1-spec sup* (R144R231)  
HB25377 *yhdK::erm yidC1 P<sub>M-lacZ</sub> thrC::yidC1-spec sup* (R72K140)  
HB25378 *yhdK::erm yidC1 P<sub>M-lacZ</sub> thrC::yidC1-spec sup* (R73R228)  
HB25379 *yhdK::erm yidC1 P<sub>M-lacZ</sub> thrC::yidC1-spec sup* (K140R231)  
HB25380 *yhdK::erm yidC1 P<sub>M-lacZ</sub> thrC::yidC1-spec sup* (R76R144)  
HB25381 *yhdK::erm yidC1 P<sub>M-lacZ</sub> thrC::yidC1-spec sup* (R73R144)  
HB25382 *yhdK::erm yidC1 P<sub>M-lacZ</sub> thrC::yidC1-spec sup* (R73R231)  
HB25383 *yhdK::erm yidC1 P<sub>M-lacZ</sub> thrC::yidC1-spec sup* (K140R228)  
HB25384 *yhdK::erm yidC1 P<sub>M-lacZ</sub> thrC::yidC1-spec sup* (R228R231)  
HB25385 *yhdK::erm yidC1 P<sub>M-lacZ</sub> thrC::yidC1-spec sup* (R72R144)  
HB25386 *yhdK::erm yidC1 P<sub>M-lacZ</sub> thrC::yidC1-spec sup* (K140R144R231)  
HB25387 *yhdK::erm yidC1 P<sub>M-lacZ</sub> thrC::yidC1-spec sup* (R73K140R144)  
HB23987 *yidC1 P<sub>M-lacZ</sub> thrC::yidC1-spec sup* (R73K140)  
HB23988 *yidC1 P<sub>M-lacZ</sub> thrC::yidC1-spec sup* (R76R228)  
HB23989 *yidC1 P<sub>M-lacZ</sub> thrC::yidC1-spec sup* (K140R144)  
HB23990 *yidC1 P<sub>M-lacZ</sub> thrC::yidC1-spec sup* (R72K140R144)  
HB23991 *yidC1 P<sub>M-lacZ</sub> thrC::yidC1-spec sup* (R76K140R228)  
HB25388 *yhdK::erm yidC1 P<sub>M-lacZ</sub> thrC::yidC1-spec sup* (R73K140)  
HB25389 *yhdK::erm yidC1 P<sub>M-lacZ</sub> thrC::yidC1-spec sup* (R76R228)  
HB25390 *yhdK::erm yidC1 P<sub>M-lacZ</sub> thrC::yidC1-spec sup* (K140R144)  
HB25391 *yhdK::erm yidC1 P<sub>M-lacZ</sub> thrC::yidC1-spec sup* (R72K140R144)  
HB25392 *yhdK::erm yidC1 P<sub>M-lacZ</sub> thrC::yidC1-spec sup* (R76K140R228)  
HB25404 *yhdK::erm yidC1 P<sub>M-lacZ</sub> thrC::yidC1-spec WT* (R73)

HB25107 *P<sub>M</sub>-lacZ gana::P<sub>xyIA</sub>-yhdL yhdL::kan yidC1 thrC::yidC1 sup* (R144R231)  
HB25108 *P<sub>M</sub>-lacZ gana::P<sub>xyIA</sub>-yhdL yhdL::kan yidC1 thrC::yidC1 sup* (R72K140)  
HB25109 *P<sub>M</sub>-lacZ gana::P<sub>xyIA</sub>-yhdL yhdL::kan yidC1 thrC::yidC1 sup* (R73K140)  
HB25110 *P<sub>M</sub>-lacZ gana::P<sub>xyIA</sub>-yhdL yhdL::kan yidC1 thrC::yidC1 sup* (R73R228)  
HB25111 *P<sub>M</sub>-lacZ gana::P<sub>xyIA</sub>-yhdL yhdL::kan yidC1 thrC::yidC1 sup* (R76R228)  
HB25112 *P<sub>M</sub>-lacZ gana::P<sub>xyIA</sub>-yhdL yhdL::kan yidC1 thrC::yidC1 sup* (K140R231)  
HB25113 *P<sub>M</sub>-lacZ gana::P<sub>xyIA</sub>-yhdL yhdL::kan yidC1 thrC::yidC1 sup* (R76R144)  
HB25114 *P<sub>M</sub>-lacZ gana::P<sub>xyIA</sub>-yhdL yhdL::kan yidC1 thrC::yidC1 sup* (K140R144)  
HB25115 *P<sub>M</sub>-lacZ gana::P<sub>xyIA</sub>-yhdL yhdL::kan yidC1 thrC::yidC1 sup* (R73R144)  
HB25116 *P<sub>M</sub>-lacZ gana::P<sub>xyIA</sub>-yhdL yhdL::kan yidC1 thrC::yidC1 sup* (R73R231)  
HB25117 *P<sub>M</sub>-lacZ gana::P<sub>xyIA</sub>-yhdL yhdL::kan yidC1 thrC::yidC1 sup* (K140R228)  
HB25118 *P<sub>M</sub>-lacZ gana::P<sub>xyIA</sub>-yhdL yhdL::kan yidC1 thrC::yidC1 sup* (R228R231)  
HB25119 *P<sub>M</sub>-lacZ gana::P<sub>xyIA</sub>-yhdL yhdL::kan yidC1 thrC::yidC1 sup* (R72R144)  
HB25120 *P<sub>M</sub>-lacZ gana::P<sub>xyIA</sub>-yhdL yhdL::kan yidC1 thrC::yidC1 sup* (R72K140R144)  
HB25121 *P<sub>M</sub>-lacZ gana::P<sub>xyIA</sub>-yhdL yhdL::kan yidC1 thrC::yidC1 sup* (R76K140R228)  
HB25122 *P<sub>M</sub>-lacZ gana::P<sub>xyIA</sub>-yhdL yhdL::kan yidC1 thrC::yidC1 sup* (K140R144R231)  
HB25123 *P<sub>M</sub>-lacZ gana::P<sub>xyIA</sub>-yhdL yhdL::kan yidC1 thrC::yidC1 sup* (R73K140R228)  
HB25124 *P<sub>M</sub>-lacZ gana::P<sub>xyIA</sub>-yhdL yhdL::kan yidC1 thrC::yidC1 sup* (R73K140R144)  
HB25227 *yidC2'-lacZ yidC1 thrC::yidC1 sup* (R144R231)  
HB25228 *yidC2'-lacZ yidC1 thrC::yidC1 sup* (R72K140)  
HB25229 *yidC2'-lacZ yidC1 thrC::yidC1 sup* (R73K140)  
HB25230 *yidC2'-lacZ yidC1 thrC::yidC1 sup* (R73R228)  
HB25231 *yidC2'-lacZ yidC1 thrC::yidC1 sup* (R76R228)  
HB25232 *yidC2'-lacZ yidC1 thrC::yidC1 sup* (K140R231)  
HB25233 *yidC2'-lacZ yidC1 thrC::yidC1 sup* (R76R144)  
HB25234 *yidC2'-lacZ yidC1 thrC::yidC1 sup* (K140R144)  
HB25235 *yidC2'-lacZ yidC1 thrC::yidC1 sup* (R73R144)  
HB25236 *yidC2'-lacZ yidC1 thrC::yidC1 sup* (R73R231)  
HB25237 *yidC2'-lacZ yidC1 thrC::yidC1 sup* (K140R228)  
HB25238 *yidC2'-lacZ yidC1 thrC::yidC1 sup* (R228R231)  
HB25239 *yidC2'-lacZ yidC1 thrC::yidC1 sup* (R72R144)  
HB25240 *yidC2'-lacZ yidC1 thrC::yidC1 sup* (R72K140R144)

HB25241 *yidC2'-lacZ yidC1 thrC::yidC1 sup* (R76K140R228)  
 HB25242 *yidC2'-lacZ yidC1 thrC::yidC1 sup* (K140R144R231)  
 HB25243 *yidC2'-lacZ yidC1 thrC::yidC1 sup* (R73K140R228)  
 HB25244 *yidC2'-lacZ yidC1 thrC::yidC1 sup* (R73K140R144)  
 HB25287 *yidC2 ganA::P<sub>xyIA</sub>-yidC2 yidC1::kan thrC::yidC1 sup* (R144R231)  
 HB25288 *yidC2 ganA::P<sub>xyIA</sub>-yidC2 yidC1::kan thrC::yidC1 sup* (R72K140)  
 HB25289 *yidC2 ganA::P<sub>xyIA</sub>-yidC2 yidC1::kan thrC::yidC1 sup* (R73K140)  
 HB25290 *yidC2 ganA::P<sub>xyIA</sub>-yidC2 yidC1::kan thrC::yidC1 sup* (R73R228)  
 HB25291 *yidC2 ganA::P<sub>xyIA</sub>-yidC2 yidC1::kan thrC::yidC1 sup* (R76R228)  
 HB25292 *yidC2 ganA::P<sub>xyIA</sub>-yidC2 yidC1::kan thrC::yidC1 sup* (K140R231)  
 HB25293 *yidC2 ganA::P<sub>xyIA</sub>-yidC2 yidC1::kan thrC::yidC1 sup* (R76R144)  
 HB25294 *yidC2 ganA::P<sub>xyIA</sub>-yidC2 yidC1::kan thrC::yidC1 sup* (K140R144)  
 HB25295 *yidC2 ganA::P<sub>xyIA</sub>-yidC2 yidC1::kan thrC::yidC1 sup* (R73R144)  
 HB25296 *yidC2 ganA::P<sub>xyIA</sub>-yidC2 yidC1::kan thrC::yidC1 sup* (R73R231)  
 HB25297 *yidC2 ganA::P<sub>xyIA</sub>-yidC2 yidC1::kan thrC::yidC1 sup* (K140R228)  
 HB25298 *yidC2 ganA::P<sub>xyIA</sub>-yidC2 yidC1::kan thrC::yidC1 sup* (R228R231)  
 HB25299 *yidC2 ganA::P<sub>xyIA</sub>-yidC2 yidC1::kan thrC::yidC1 sup* (R72R144)  
 HB25300 *yidC2 ganA::P<sub>xyIA</sub>-yidC2 yidC1::kan thrC::yidC1 sup* (R72K140R144)  
 HB25301 *yidC2 ganA::P<sub>xyIA</sub>-yidC2 yidC1::kan thrC::yidC1 sup* (R76K140R228)  
 HB25302 *yidC2 ganA::P<sub>xyIA</sub>-yidC2 yidC1::kan thrC::yidC1 sup* (K140R144R231)  
 HB25303 *yidC2 ganA::P<sub>xyIA</sub>-yidC2 yidC1::kan thrC::yidC1 sup* (R73K140R228)  
 HB25304 *yidC2 ganA::P<sub>xyIA</sub>-yidC2 yidC1::kan thrC::yidC1 sup* (R73K140R144)  
 HB23636 *htrA::kan*  
 HB23637 *htrB::kan*  
 HB23638 *glpG::kan*  
 HB23639 *sipS::kan*  
 HB23640 *sipT::kan*  
 HB23641 *htpX::kan*  
 HB23648 *htrAB*  
 HB23650 *sacA::P<sub>htrA</sub>-lux-cat*  
 HB25678 *sacA::P<sub>htrA</sub>-lux-erm*  
 HB23651 *cssR*

Chloramphenicol<sup>R</sup> provided by plasmid pBs3Clux

Cam<sup>R</sup> cassette replaced by Erm<sup>R</sup> cassette using LFH PCR, Primers 6878-6881

|         |                                                                            |                         |
|---------|----------------------------------------------------------------------------|-------------------------|
| HB23653 | <i>cssS</i>                                                                |                         |
| HB23657 | <i>sacA::P<sub>htrA</sub>-lux yidCJ<sup>Q140K</sup></i>                    |                         |
| HB23660 | <i>amyE::P<sub>spac(hy)</sub>-none</i>                                     | pPL82 empty vector      |
| HB23663 | <i>amyE::P<sub>spac(hy)</sub>-htrA</i>                                     | constructed using pPL82 |
| HB23664 | <i>amyE::P<sub>spac(hy)</sub>-htrB</i>                                     | constructed using pPL82 |
| HB25679 | <i>sacA::P<sub>htrA</sub>-lux-erm cssR</i>                                 |                         |
| HB25680 | <i>sacA::P<sub>htrA</sub>-lux-erm cssS</i>                                 |                         |
| HB25681 | <i>sacA::P<sub>htrA</sub>-lux-erm cssRS</i>                                |                         |
| HB25682 | <i>amyE::P<sub>spac(hy)</sub>-cssS cssS sacA::P<sub>htrA</sub>-lux-erm</i> |                         |
| HB23682 | <i>prsW::kan</i>                                                           |                         |
| HB23690 | <i>cssS htrB</i>                                                           |                         |
| HB23910 | <i>secDF</i>                                                               |                         |
| HB23926 | <i>sasA</i>                                                                |                         |
| HB23806 | <i>bshC</i>                                                                |                         |
| HB23807 | <i>msrA</i>                                                                |                         |
| HB23808 | <i>nfrA</i>                                                                |                         |
| HB23809 | <i>tpx</i>                                                                 |                         |
| HB23811 | <i>bshA</i>                                                                |                         |
| HB25410 | <i>htrA::kan yhdK::erm</i>                                                 |                         |
| HB25411 | <i>htrB::kan yhdK::erm</i>                                                 |                         |
| HB25412 | <i>glpG::kan yhdK::erm</i>                                                 |                         |
| HB25413 | <i>sipS::kan yhdK::erm</i>                                                 |                         |
| HB25414 | <i>sipT::kan yhdK::erm</i>                                                 |                         |
| HB25415 | <i>htpX::kan yhdK::erm</i>                                                 |                         |
| HB25416 | <i>htrAB yhdK::erm</i>                                                     |                         |
| HB25417 | <i>cssR yhdK::erm</i>                                                      |                         |
| HB25418 | <i>cssS yhdK::erm</i>                                                      |                         |
| HB25419 | <i>prsW::kan yhdK::erm</i>                                                 |                         |
| HB25420 | <i>cssS htrB yhdK::erm</i>                                                 |                         |
| HB25421 | <i>secDF yhdK::erm</i>                                                     |                         |
| HB25422 | <i>sasA yhdK::erm</i>                                                      |                         |
| HB25423 | <i>bshC yhdK::erm</i>                                                      |                         |

|         |                                                                  |
|---------|------------------------------------------------------------------|
| HB25424 | <i>msrA yhdK::erm</i>                                            |
| HB25425 | <i>nfrA yhdK::erm</i>                                            |
| HB25426 | <i>tpx yhdK::erm</i>                                             |
| HB25427 | <i>bshA yhdK::erm</i>                                            |
| HB25428 | <i>amyE::P<sub>spac(hy)</sub>-none yhdK::erm</i>                 |
| HB25429 | <i>amyE::P<sub>spac(hy)</sub>-htrA yhdK::erm</i>                 |
| HB25430 | <i>amyE::P<sub>spac(hy)</sub>-htrB yhdK::erm</i>                 |
| HB25431 | <i>sacA::P<sub>htrA</sub>-lux yhdK::erm</i>                      |
| HB25432 | <i>sacA::P<sub>htrA</sub>-lux yidC<sup>Q140K</sup> yhdK::erm</i> |

- 
1. Rojas-Tapias DF & Helmann JD (2018) Induction of the Spx regulon by cell wall stress reveals novel regulatory mechanisms in *Bacillus subtilis*. *Mol Microbiol* 107(5):659-674.
  2. Koo BM, *et al.* (2017) Construction and Analysis of Two Genome-Scale Deletion Libraries for *Bacillus subtilis*. *Cell Syst* 4(3):291-305 e297.
  3. Chiba S, Lamsa A, & Pogliano K (2009) A ribosome-nascent chain sensor of membrane protein biogenesis in *Bacillus subtilis*. *EMBO J* 28(22):3461-3475.
