# Supplementary material for: Mutations of the Bacillus subtilis YidC1 (SpoIIIJ) insertase alleviate stress associated with σM-dependent membrane protein overproduction
Source: PubMed Central journal article supplement (PMC6827917; doi:10.1371/journal.pgen.1008263), 2019-10-18
Supplement: pgen.1008263.s012.pdf [file pgen.1008263.s012.pdf]

**Table S6. Primers used in this study**

| Number | Name                   | Sequence                                              |
|--------|------------------------|-------------------------------------------------------|
| 1295   | kan-F                  | CAGCGAACCATTTGAGGTGATAGG                              |
| 1296   | kan-R                  | CGATACAAATTCCTCGTAGGCGCTCG                            |
| 6580   | sigM-F-NotI            | ATCGGCGGCCGCGCACTATCTTTTTCGCGCCAT                     |
| 6581   | sigM-R-HindIII         | ATCGAAGCTTTGGTCGCTCATTTCCCAT                          |
| 6582   | yhdL-up-F              | GCCGTTTTTCGTTGCGAGAAT                                 |
| 6583   | yhdL-up-R              | CGCCGACATTCGCTGATTTTTCTGGTCGCTCATTTCCC                |
| 6584   | yhdL-mid-F             | GGGAAATGAGCGACCAGGAAAAATCAGCGAATGTCGGCG               |
| 6585   | yhdL-mid-R             | CCTATCACCTCAAATGGTTCGCTGTCCGAAAACCGGTATAACGAAA        |
| 6586   | yhdL-down-F            | CGAGCGCCTACGAGGAATTTGTATCGAGATACGAATTTACAGTTTGGCT     |
| 6587   | yhdL-down-R            | ACGAATCGGGCAATCATGTG                                  |
| 6588   | chr-sigM-seq-F         | CCATTGTGCCACTCCTTCAC                                  |
| 6589   | chr-sigM-seq-R         | TGCAGTCATTTCTGGTCGC                                   |
| 6590   | pAX01-check-F          | GGGGGAAATGACAAATGGTCC                                 |
| 6591   | pAX01-check-R          | ACGAAAGGGCCTCGTGATAC                                  |
| 6599   | Pxyl-yhdL-F-BamHI      | ATCGGGATCCTAGAGGGGAGAAAAGGCAATGATGAATGAAGAATTTAAAAAGC |
| 6600   | Pxyl-yhdL-R-SacII      | ATCGCCGCGGTCCAGCCGAATACATTGTG                         |
| 6693   | pAX01-erm-cm-up-F      | GCCGCACTCTTCCTTTTTCAA                                 |
| 6694   | pAX01-erm-cm-up-R      | CTTGATAATAAGGGTAACTATTGCCTTTGGTTGAGTACTTTTTCACTCG     |
| 6695   | pAX01-erm-cm-down-F    | GGGTAAGTACCTCGCCGGTCCACGCTGGGGGAGGAAATAATTCTATGAGTCGC |
| 6696   | pAX01-erm-cm-down-R    | TCGGCATTTTTGCATGGAGC                                  |
| 6759   | yhdL-check-F           | ACGCTGGGAAGCTACCTCTA                                  |
| 6760   | yhdL-check-R           | TCTGCTTTTTCGGTCGTTTG                                  |
| 6808   | PsigM-F-EcoRI          | AGCTGAATTCGCCGTTTGCATGTAATGTG                         |
| 6809   | PsigM-R-PstI           | AGCTCTGCAGCAGTAAGTCTTCAGCAAGATGC                      |
| 6814   | pBs1ClacZ(lux)-check-F | AAAGGATTTGAGCGTAGCGA                                  |
| 6815   | pBs1ClacZ-check-R      | TTGGGTAACGCCAGGGTTTT                                  |
| 6816   | pBs3Clux-check-R       | GAGAGTCCTCCTGTGACCT                                   |
| 6861   | cssS-check-F           | CCGCGAGGTCTATGACGAAA                                  |
| 6862   | cssS-check-R           | AGCTCAAGCGAAAGGGTGAA                                  |

|      |                          |                                                          |
|------|--------------------------|----------------------------------------------------------|
| 6878 | pBs3CLux-Cat-up-F        | TGTTTGACAGCTTATCATCGGC                                   |
| 6879 | pBs3CLux-Cat-Erm-up-R    | CCTATCACCTCAAATGGTTCGCTGACTAAAAGTCGTTTGGTTCA             |
| 6880 | pBs3CLux-Cat-Erm-down-F  | CGAGCGCCTACGAGGAATTTGTATCGTCAGATAGGCCTAATGACTGGC         |
| 6881 | pBs3CLux-Cat-down-R      | TTCCGATCCGAAGTATGGG                                      |
| 7348 | pJOE8999-check-F         | CCTTTTTCGCGTGATGCGA                                      |
| 7349 | pJOE8999-check-R         | GTCAGCTAGGAGGTGACTGA                                     |
| 7426 | Delta-Pam-rodA-up-F      | AAGGCCAACGAGGCCTCTGCTGAACACAGTCACTT                      |
| 7427 | Delta-Pm-rodA-up-R       | CGCTTTTTCAGCTACACGAAATGCGATAATGTGTTATGTTCCC              |
| 7428 | Delta-Pm-rodA-down-F     | GGGAACATAACACATTATCGCATTTCGTGTAGCTGAAAAAGCG              |
| 7429 | Delta-Pm-rodA-down-R     | AAGGCCTTATTGGCCCTCATTTGAAGCAGACACCC                      |
| 7430 | ProdA-deltaPm-gRNA-F     | TACGCGTTTTTTAACAAATTCTAT                                 |
| 7431 | ProdA-deltaPm-gRNA-R     | AAACATAGAATTTGTTAAAAAACG                                 |
| 7815 | yidC1-seq-F              | ACGGGAGATAACTACGGGCT                                     |
| 7816 | yidC1-seq-R              | GCTTCATCGACATTTCCGCC                                     |
| 7866 | yidC1-gRNA-F             | TACGATCCAATTAATAATCGGCATC                                |
| 7867 | yidC1-gRNA-R             | AAACGATGCCGATTTTAATTGGAT                                 |
| 7868 | yidC1-up-F               | AAGGCCAACGAGGCCTATTGCCAGAAAACCGGCGA                      |
| 7869 | yidC1-up-R               | TCGCATGATAGAATCCAATTAAGATAGGCATCTTGATCAAAATCGGGAAACATCCC |
| 7870 | yidC1-down-F             | GGGATGTTTCCCGATTTTGATCAAGATGCCTATCTTAATTGGATTCTATCATGCGA |
| 7871 | yidC1-down-R             | AAGGCCTTATTGGCCATCAGACTTCCC GGCAATGG                     |
| 8120 | yidC2-check-F            | TCCTGCTCTAACGGCAATCG                                     |
| 8121 | yidC2-check-R            | CTTTTGCACGGGTTGCTT                                       |
| 8246 | yidC1-PY79-to-168-down-F | CATTGGCGGGATGTTTCCC GATCTTGATCCAGATGCCGATTTTAATTGGA      |
| 8247 | yidC1-PY79-to-168-up-R   | AAAATCGGCATCTGGATCAAGATCGGGAAACATCCC GCCAATG             |
| 8248 | yidC1-PY79-to-168-gRNA-F | TACGATCGGCATCTTGATCAAAAT                                 |
| 8249 | yidC1-PY79-to-168-gRNA-R | AAACATTTTGATCAAGATGCCGAT                                 |
| 8250 | jag-check-F              | TGCGATCATGAGAACCCAGG                                     |
| 8251 | jag-check-R              | AGTTTGGTTCGAAGTGGAAGA                                    |
| 8264 | PsigM-F-HindIII          | ATCGAAGCTTGCCGTTTGCATGTAATGTG                            |
| 8265 | PsigM-R-BamHI            | ATCGGGATCCCAGTAAGTCTTCAGCAAGATGC                         |
| 8266 | pDG1663-check-F          | CCAACATGACGAATCCCTCC                                     |
| 8267 | pDG1663-check-R          | TAAGTTGGGTAACGCCAGGG                                     |

|      |                          |                                                                    |
|------|--------------------------|--------------------------------------------------------------------|
| 8276 | YidC2-SpeI-F             | ATCGACTAGTACCGCATTTATAAAAAGGAGGAGAA                                |
| 8277 | YidC2-BamHI-R            | ATCGGGATCCTCAGCCATGATAAAACAAGACT                                   |
| 8278 | yidC1-R73A-gRNA-F        | TACGAATTAATAAACGAATTAATA                                           |
| 8279 | yidC1-R73A-gRNA-R        | AAACTTTTAATTCGTTTATTAATT                                           |
| 8280 | YidC1-R73A-repair-up-R   | GCTGCTTAATCATCAGCGGTAAAATTAATAATGCAATTAATAATGGTAACTAGAATAATTGAAAGC |
| 8281 | YidC1-R73A-repair-down-F | GCTTTCATTAATTCTAGTTACCATTTAATTGCATTATTAATTTTACCGCTGATGATTAAGCAGC   |
| 8282 | yidC1-SpeI-F             | ATCGACTAGTAGATTAATTATAGGAGGAAATGTTGT                               |
| 8283 | yidC1-BamHI-R            | ATCGGGATCCAGCAGTCACATTCCTCACTTTT                                   |
| 8341 | Ec-YidC-seq-F            | CCACGCCTGACGAGAAGTAT                                               |
| 8342 | Ec-YidC-seq-R            | AGTTTGAACAGCGGCTGAGA                                               |
| 8343 | Ec-YidC-HindIII-F        | ATCGAAGCTTTAAGGAGGACTAACGATGGATTTCGCAACGCA                         |
| 8344 | Ec-YidC-XbaI-R           | ATCGTCTAGAAGCGAAAACCTACCGAATCAGGA                                  |
| 8345 | YidC2-HindIII-F          | ATCGAAGCTTACCGCATTTATAAAAAGGAGGAGAA                                |
| 8346 | YidC2-XbaI-R             | ATCGTCTAGATCAGCCATGATAAAACAAGACT                                   |
| 8347 | yidC1-XmaI-F             | ATCGCCCCGGGAGATTAATTATAGGAGGAAATGTTGT                              |
| 8348 | YidC1-XbaI-R             | ATCGTCTAGAAGCAGTCACATTCCTCACTTTT                                   |
| 8349 | jag-XbaI-R               | ATCGTCTAGAAGTTTGGTTCGAAGTGGAAGA                                    |
| 8352 | pDG1663-up-F             | TTGGGTAACGCCAGGGTTTT                                               |
| 8353 | pDG1663-spec-up-R        | CGTTACGTTATTAGCGAGCCAGTCTGGTTGAGTACTTTTTTCATTCGTT                  |
| 8354 | pDG1663-spec-down-F      | CAATAAACCCCTTGCCCTCGCTACGTCAAGCAATGAAACACGCCA                      |
| 8355 | pDG1663-down-R           | ACCGCTGTGTTCCGATCTTT                                               |
| 8364 | Ec-YidC-Q429K-up-R       | AGGAAGATTGGCATCTTGATCAGCAGCGGGAAGCA                                |
| 8365 | Ec-YidC-Q429K-down-F     | CTTCCCGCTGCTGATCAAGATGCCAATCTTCCTGGCGT                             |
| 8371 | htrA-check-F             | CTGTTCCATCGACTCAGTCCT                                              |
| 8372 | htrA-check-R             | CGCAGATCATACCCAGTCCC                                               |
| 8373 | htrB-check-F             | AGAGCGAGGAAGATGTAGGA                                               |
| 8374 | htrB-check-R             | TCGGCCTGGCTGAAGAAAAT                                               |
| 8375 | htrX-check-F             | CGCACCATATCGGTTTCGAGA                                              |
| 8376 | htrX-check-R             | AACGGCCACAGTAACTGCAA                                               |
| 8377 | sipT-check-F             | AGTATCGTGATCGGTGCTGT                                               |
| 8378 | sipT-check-R             | AAGCGCGGAAAAGAGAACAAA                                              |
| 8379 | sipS-check-F             | AGGCATGATGTGGGTAGAAGA                                              |

|      |                |                                                  |
|------|----------------|--------------------------------------------------|
| 8380 | sipS-check-R   | ACGATGCATAACGGGAATATGT                           |
| 8381 | prsW-check-F   | GGCATATCGCAGCGGAAATC                             |
| 8382 | prsW-check-R   | TTCAAGCCTCCTACTGCAAA                             |
| 8383 | cssR-check-F   | TCCTCGCTCTTTTCTCTTCCT                            |
| 8384 | cssR-check-R   | AGGCGGTACTCTGTCAGAAC                             |
| 8385 | cssR-RT-F      | AGGCGAAAGATCCTGACGTG                             |
| 8386 | cssR-RT-R      | CTCACGAGAGTATGGATGCCC                            |
| 8389 | cssS-int-F     | TTATCGGGACGATTTGGCCT                             |
| 8390 | cssS-int-R     | CTCTGATGACCATGACCGGC                             |
| 8399 | htrA-HindIII-F | ATCGAAGCTTTAAGGAGGGAACATGATGGATAACTATCGTGA       |
| 8400 | htrA-XmaI-R    | ATCGCCCCGGGTTTACGGCCTGAGGCATTAT                  |
| 8401 | htrB-XmaI-F    | ATCGCCCCGGGTAAGGAGGTAAGAACATGGATTATCGACGTGA      |
| 8402 | htrB-XbaI-R    | ATCGTCTAGAATGCTTTCCTCTTATTTAGGGTAACA             |
| 8403 | PhtrA-XbaI-F   | ATCGTCTAGATCAACAGCTGTCTAGCGAT                    |
| 8404 | PhtrA-PstI-R   | ATCGCTGCAGTCTCTATTTTCACATGTCTATTTATATTGA         |
| 8442 | htrA-int-F     | GCAACAAGCACCTCCTCTGA                             |
| 8443 | htrA-int-R     | GTCCACGCCGCTTACAATTC                             |
| 8444 | htrB-int-F     | ACGAACGCATCAAACATCGC                             |
| 8445 | htrB-int-R     | TGTCAATCATCTGCACGCCT                             |
| 8652 | bshC-check-F   | TGCTGGTTGACGTCATTGGA                             |
| 8653 | bshC-check-R   | TGCTCACCTAGGCCTTCTCT                             |
| 8654 | msrA-check-F   | TGAATTCATTCCGCGACAGC                             |
| 8655 | msrA-check-R   | CCGTGCCGTTATTTTGC GTT                            |
| 8656 | nfrA-check-F   | GTCAGCTATGGGGGAAGCTC                             |
| 8657 | nfrA-check-R   | GTTTCTGCATTGCTGCCCTC                             |
| 8658 | tpx-check-F    | TTGTCCGATCGACAGGCATC                             |
| 8659 | tpx-check-R    | CACCGCACCTACATGGTCTT                             |
| 8676 | cssS-int-F     | TTATCGGGACGATTTGGCCT                             |
| 8677 | cssS-int-R     | CTCTGATGACCATGACCGGC                             |
| 8681 | yidC1-spc-2-R  | CTCTTGCCAGTCACGTTACGTTATTAGCTGCAGCAGTCACATTCCTCA |
| 8682 | yidC1-spc-3-F  | TGAGGAATGTGACTGCTGCAGCTAATAACGTAACGTGACTGGCAAGAG |
| 8686 | yidC1-MUT-2-F  | ATTACCGCTGATGATTAAGCAGCT                         |

|      |                    |                                                               |
|------|--------------------|---------------------------------------------------------------|
| 8687 | yidC1-MUT-3-F      | TATTGGATTCTATCATGCGATCAT                                      |
| 8688 | yidC1-MUT-4-F      | GTAACCTGTTTATGATTGCGCAAAC                                     |
| 8689 | yidC1-MUT-1-R      | AGCTGCTTAATCATCAGCGGTAATMTAATAATYGTMTTAAAATGGTAACTAGAATAATT   |
| 8690 | yidC1-MUT-2-R      | ATGATCGCATGATAGAATCCAATAMGAATCGGCATTTKGATCAAAAATCGGGAAACATCCC |
| 8691 | yidC1-MUT-3-R      | AGTTTGCGCAATCATAAAACAAGTTACSAACTACCCRATAAAGAGAAAAGAGCCCGGGAA  |
| 8700 | dinB-RT-F          | CGGCTGGATTGAAGTGTTTT                                          |
| 8701 | dinB-RT-R          | TGTTTTCATGATTCCGCTTG                                          |
| 8702 | lexA-RT-F          | GTTCCCTCCAGACGAGCATGT                                         |
| 8703 | lexA-RT-R          | CAAGCGAATGTGGGTATCCT                                          |
| 8712 | recA-RT-F          | GTTCCGGCAAAGGTTCCATTA                                         |
| 8713 | recA-RT-R          | GCCAATTCCTCAGTGTGTAT                                          |
| 8722 | topA-RT-F          | CAGCTGACCCCGACAGAGAA                                          |
| 8723 | topA-RT-R          | ATACGTCTCGCTTGCTGTGC                                          |
| 8726 | gyrA-RT-F          | GGCGGCCATGCGTTATACAG                                          |
| 8727 | gyrA-RT-R          | GCCATACCTACCGCAATGCC                                          |
| 8728 | gyrB-RT-F          | GTGTAGGTGCGTCGGTCGTA                                          |
| 8729 | gyrB-RT-R          | GCTAATTCACGCACGCGGTT                                          |
| 8736 | secG-RT-F          | GTGCCGGATTATCTGGTGCG                                          |
| 8737 | secG-RT-R          | AAGACTGCCAGCACTACCGT                                          |
| 8759 | secDF-check-F      | GAAGAGGGCCAGGAAGCATT                                          |
| 8760 | secDF-check-R      | CATTTGCCTTGCTTCAGCGT                                          |
| 8766 | thrC-up-1-F        | TATGCATCAGGTGCGGCTGTC                                         |
| 8767 | thrC-yidC1-1-R     | TAAGAAAGCAGTGGTGATGCCAGGATTGACGCCTTCCGTTT                     |
| 8768 | thrC-yidC1-2-F     | AAACGGAAGGCGTCAATCCTGGCATCACCCTGCTTTCTTA                      |
| 8769 | spec-thrC-3-R      | GCAAACACGCCTTCTACACGGCAAGGGTTTATTGTTTTCTAAAATCTG              |
| 8770 | spec-thrC-down-4-F | CAGATTTTAGAAAACAATAAACCCCTTGCCGTGTAGAAGGCGTGTTTGC             |
| 8771 | thrC-down-4-R      | TTCCCCCTCTCCCAAACCTGA                                         |
| 8772 | thrC-yidC1-check-F | GATCAAACACCGGCGCTAAC                                          |
| 8773 | thrC-yidC1-check-R | CAACTCCTGATCCAAACATGTAAGT                                     |
| 8774 | yidC1-MUT-seq-F    | GATAGTCCGATTTCTGGGA                                           |
| 8775 | yidC1-MUT-seq-R    | TCTTGCCAGTCACGTTACGT                                          |

---
