# Supplementary material for: Mutations of the Bacillus subtilis YidC1 (SpoIIIJ) insertase alleviate stress associated with σM-dependent membrane protein overproduction
Source: PLoS Genet. 2019 Oct 18;15(10):e1008263. doi: 10.1371/journal.pgen.1008263 (PMC6827917; doi:10.1371/journal.pgen.1008263)
Supplement: S1 Table — No mutations were found in these genes. (PDF) [file pgen.1008263.s007.pdf]

**Table S1.** Genes compared between reference genomes of *B. subtilis* 168 (NCBI accession number NC\_000964.3) and PY79 (NC\_022898.1). No SNP was found in these genes.

| Accession Number | Gene         |          |              |                |              |
|------------------|--------------|----------|--------------|----------------|--------------|
|                  |              | BSU02890 | <i>yceC</i>  | BSU36530       | <i>bcrC</i>  |
|                  |              | BSU02900 | <i>yceD</i>  | BSU38120       | <i>rodA</i>  |
|                  |              | BSU02910 | <i>yceE</i>  | BSU38480       | <i>ywaC</i>  |
| <b>RNAP</b>      |              | BSU02920 | <i>yceF</i>  | BSU38260       | <i>ywbN</i>  |
| <b>subunits</b>  |              | BSU02930 | <i>yceG</i>  | BSU38250       | <i>ywbO</i>  |
| BSU01430         | <i>rpoA</i>  | BSU02940 | <i>yceH</i>  | BSU36540       | <i>ywnJ</i>  |
| BSU01070         | <i>rpoB</i>  | BSU03240 | <i>ycgQ</i>  |                |              |
| BSU01080         | <i>rpoC</i>  | BSU03250 | <i>ycgR</i>  | <b>Spx</b>     |              |
| BSU37160         | <i>rpoE</i>  | BSU04230 | <i>ydaH</i>  | <b>regulon</b> |              |
| BSU14540         | <i>rpoY</i>  | BSU04560 | <i>ddl</i>   | BSU00730       | <i>cysK</i>  |
| BSU15690         | <i>rpoZ</i>  | BSU04570 | <i>murF</i>  | BSU14710       | <i>ylaA</i>  |
|                  |              | BSU06380 | <i>yebC</i>  | BSU14720       | <i>ylaB</i>  |
| <b>SigM</b>      |              | BSU07260 | <i>yfnI</i>  | BSU14730       | <i>ylaC</i>  |
| <b>regulon</b>   |              | BSU09500 | <i>yhdK</i>  | BSU14740       | <i>ylaD</i>  |
| BSU00700         | <i>coaX</i>  | BSU09510 | <i>yhdL</i>  | BSU21680       | <i>msrB</i>  |
| BSU00620         | <i>divIC</i> | BSU09520 | <i>sigM</i>  | BSU21690       | <i>msrA</i>  |
| BSU00880         | <i>disA</i>  | BSU11490 | <i>yjbC</i>  | BSU27240       | <i>yrhC</i>  |
| BSU38500         | <i>dltA</i>  | BSU11500 | <i>spx</i>   | BSU27250       | <i>mccB</i>  |
| BSU38510         | <i>dltB</i>  | BSU14480 | <i>abh</i>   | BSU27260       | <i>mccA</i>  |
| BSU38520         | <i>dltC</i>  | BSU15230 | <i>murB</i>  | BSU27270       | <i>mtnN</i>  |
| BSU38530         | <i>dltD</i>  | BSU15240 | <i>divIB</i> | BSU27280       | <i>yrpT</i>  |
| BSU38540         | <i>dltE</i>  | BSU15250 | <i>ylxW</i>  | BSU28500       | <i>trxA</i>  |
| BSU00690         | <i>ftsH</i>  | BSU15260 | <i>ylxX</i>  | BSU29490       | <i>tpx</i>   |
| BSU00680         | <i>hprT</i>  | BSU15270 | <i>sbp</i>   | BSU31290       | <i>yugT</i>  |
| BSU21910         | <i>metA</i>  | BSU18190 | <i>yngC</i>  | BSU31370       | <i>yugJ</i>  |
| BSU28000         | <i>minC</i>  | BSU22310 | <i>recU</i>  | BSU30340       | <i>ytaA</i>  |
| BSU27990         | <i>minD</i>  | BSU22320 | <i>ponA</i>  | BSU34790       | <i>trxB</i>  |
| BSU28030         | <i>mreB</i>  | BSU22980 | <i>ypbG</i>  | BSU38110       | <i>nfrA</i>  |
| BSU28020         | <i>mreC</i>  | BSU23300 | <i>ypuD</i>  | BSU29820       | <i>ytpR</i>  |
| BSU28010         | <i>mreD</i>  | BSU23370 | <i>ypuA</i>  | BSU29830       | <i>ytpQ</i>  |
| BSU16950         | <i>pbpX</i>  | BSU23830 | <i>yqjL</i>  | BSU29840       | <i>ytpP</i>  |
| BSU36380         | <i>rapD</i>  | BSU27180 | <i>yrhH</i>  | BSU03480       | <i>srfAA</i> |
| BSU27650         | <i>secDF</i> | BSU27160 | <i>yrhJ</i>  | BSU03490       | <i>srfAB</i> |
| BSU35650         | <i>tagU</i>  | BSU27170 | <i>fatR</i>  | BSU03500       | <i>comS</i>  |
| BSU00670         | <i>tilS</i>  | BSU28040 | <i>radC</i>  | BSU03510       | <i>srfAC</i> |
| BSU21920         | <i>ugtP</i>  | BSU30500 | <i>ytpB</i>  | BSU03520       | <i>srfAD</i> |
| BSU00710         | <i>yacC</i>  | BSU30510 | <i>ytpA</i>  |                |              |
| BSU00890         | <i>yacL</i>  | BSU35840 | <i>tagT</i>  |                |              |
| BSU00900         | <i>ispD</i>  |          |              |                |              |
